# Supplementary figures and images for: The multi-subunit GID/CTLH E3 ubiquitin ligase promotes cell proliferation and targets the transcription factor Hbp1 for degradation
Source: eLife journal article supplement (doi:10.7554/elife.35528), 2018-06-18

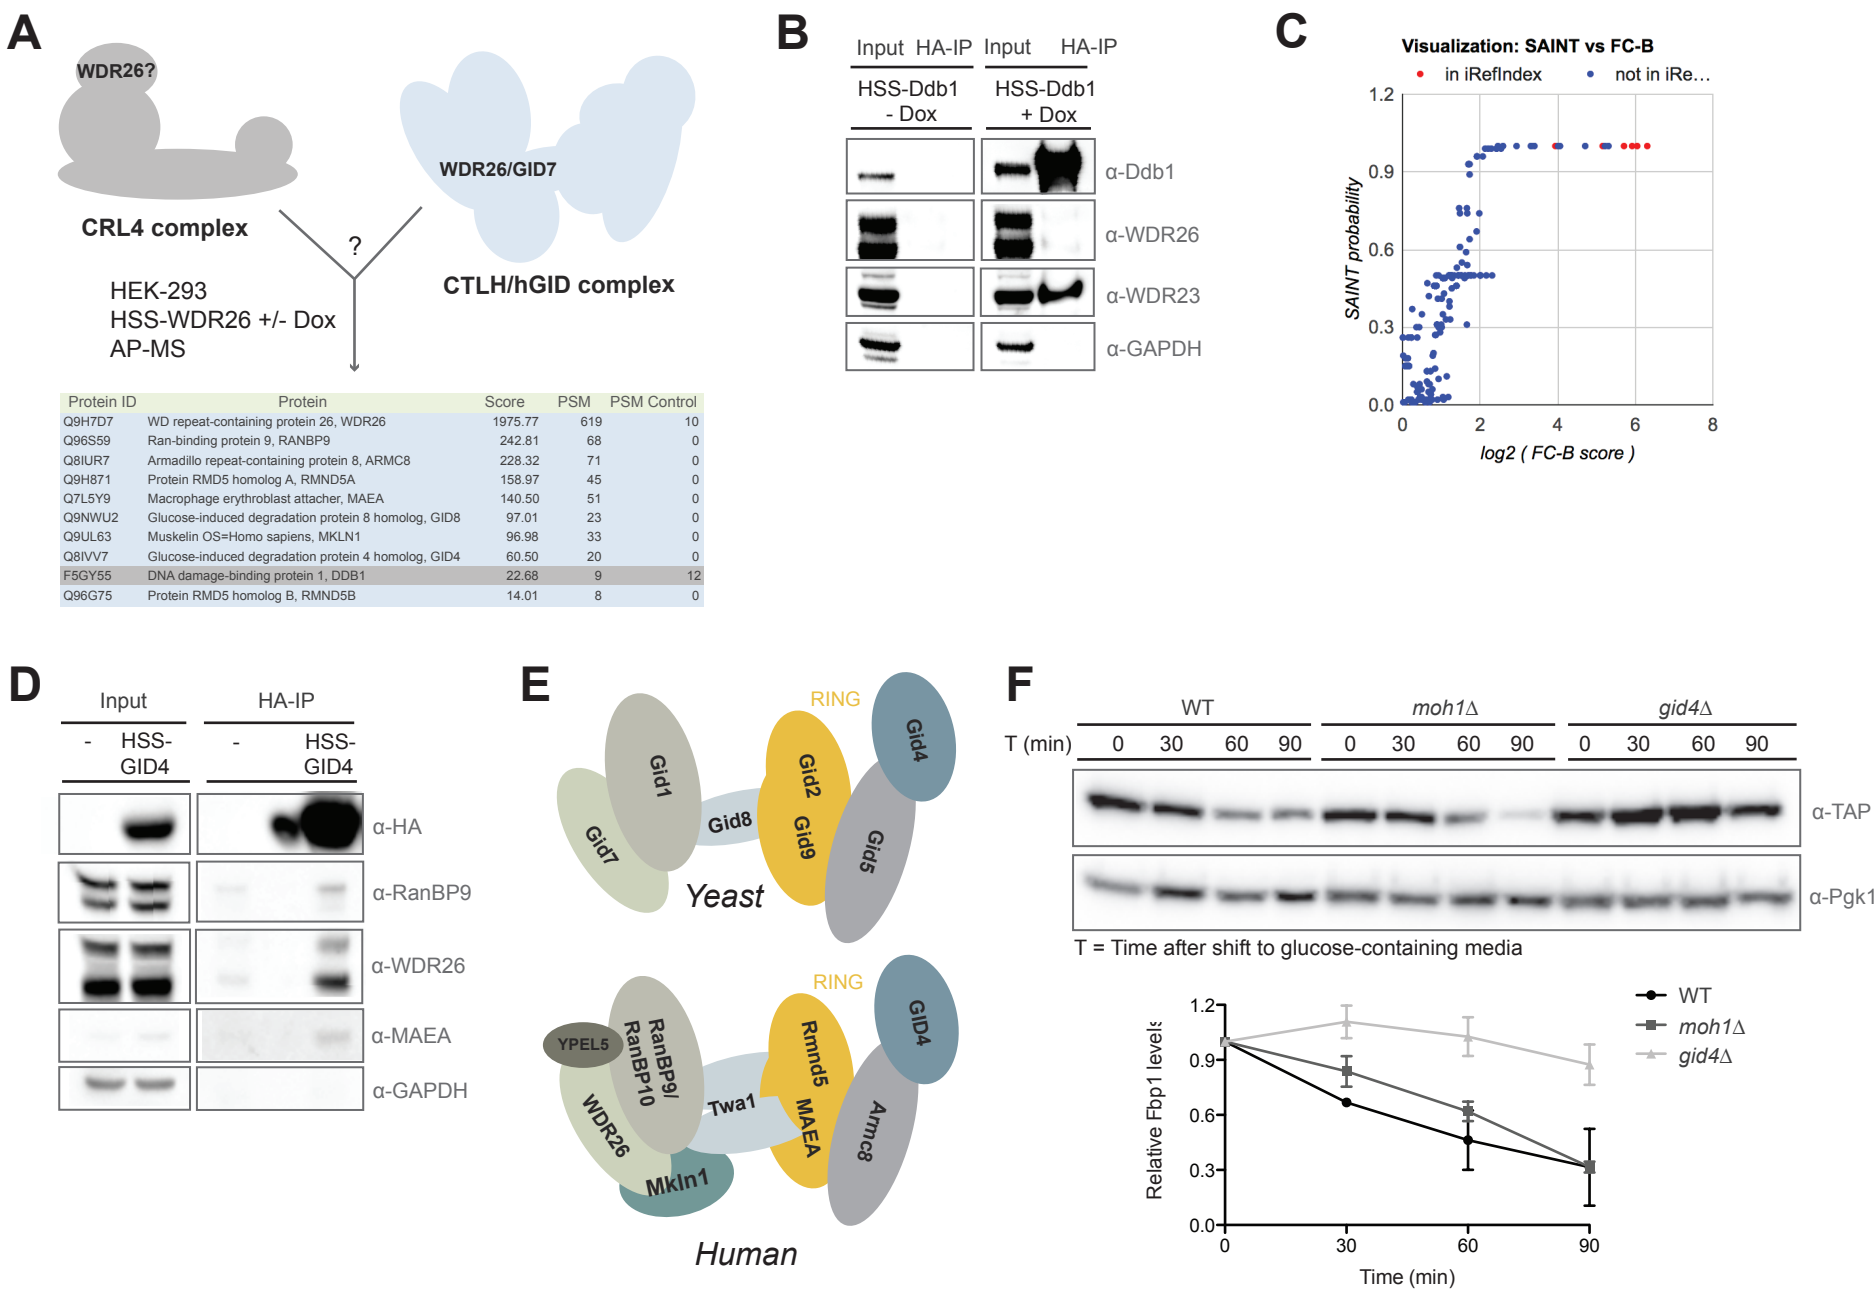

Supplement: supp [file elife_poa_e35528_Figure_1_figure_supplement_1.pdf › elife_poa_e35528_Figure_1_figure_supplement_1.pdf]

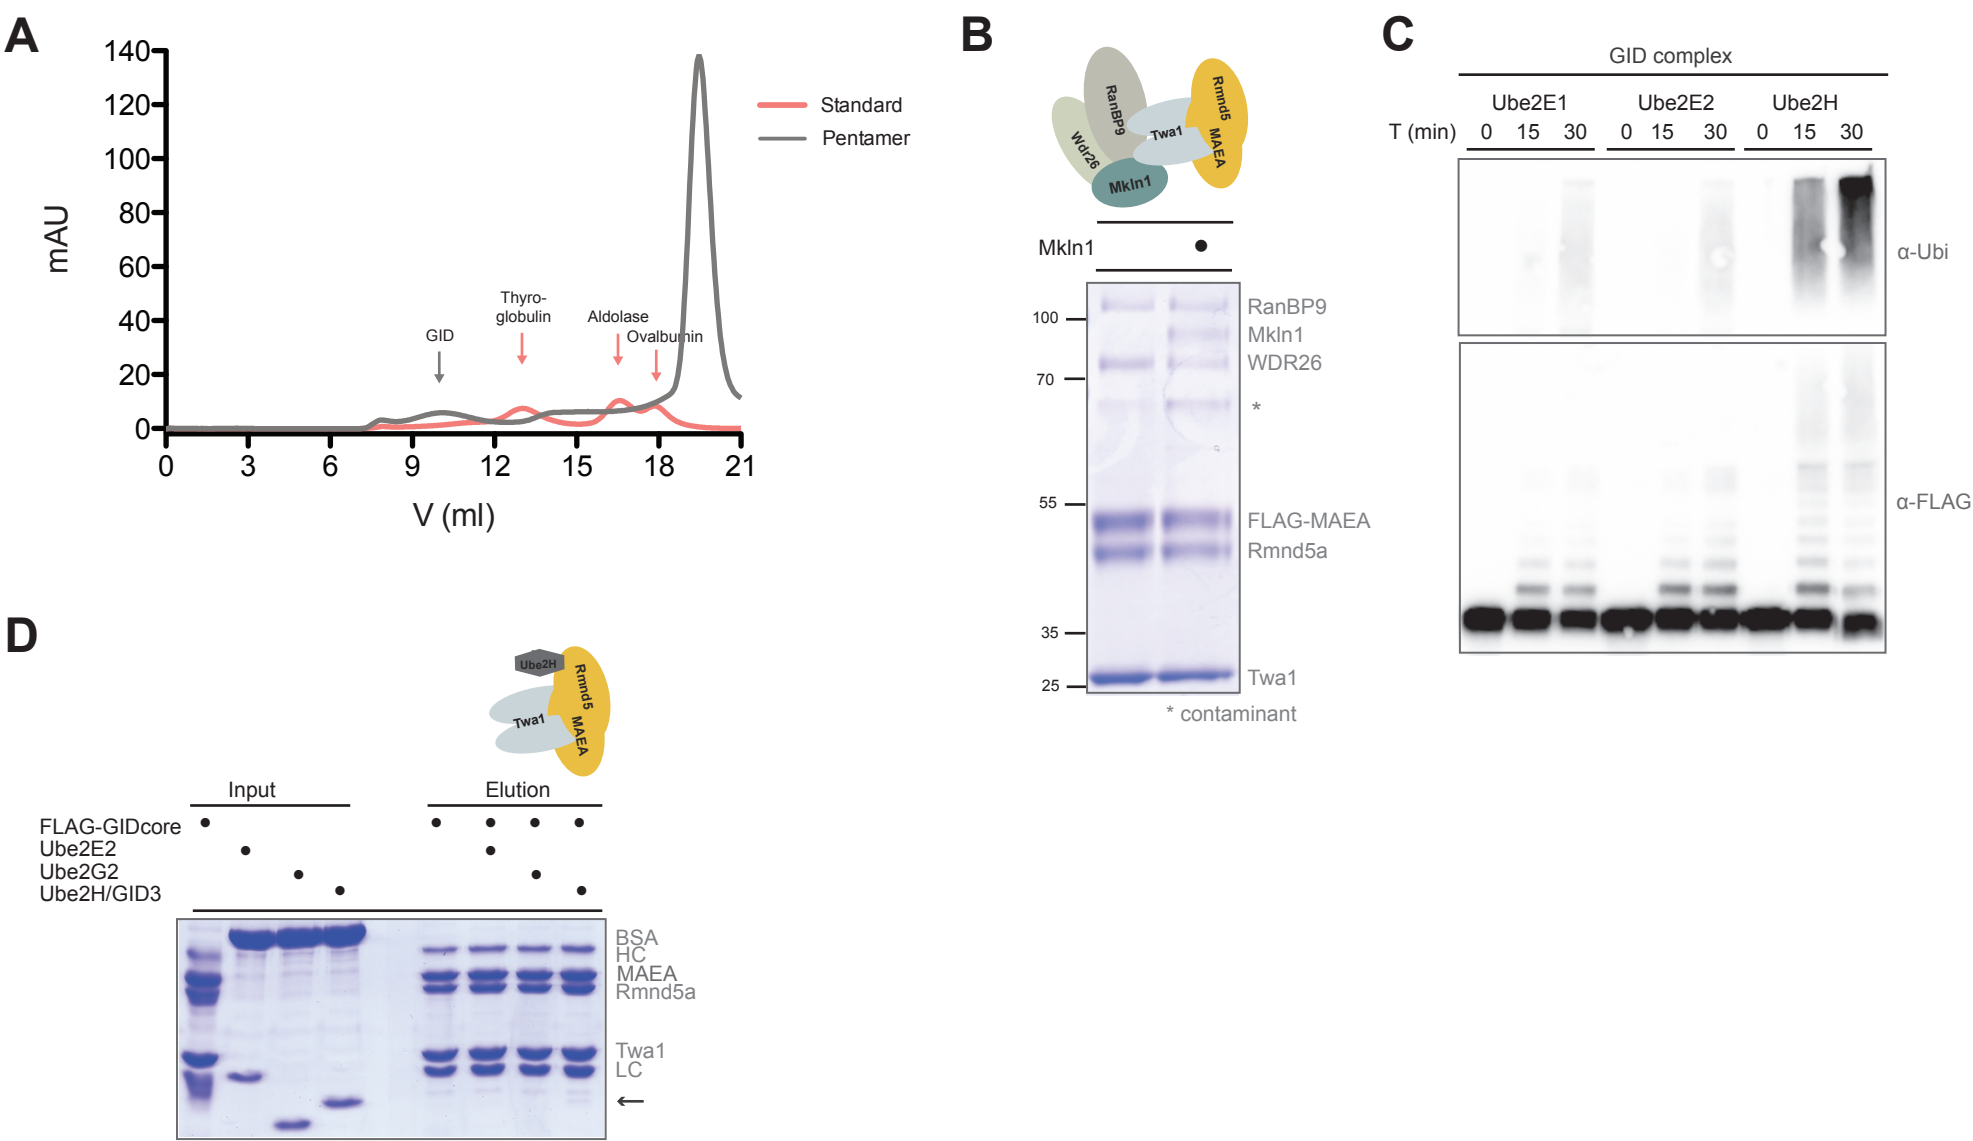

Supplement: supp [file elife_poa_e35528_Figure_2_figure_supplement_1.pdf › elife_poa_e35528_Figure_2_figure_supplement_1.pdf]

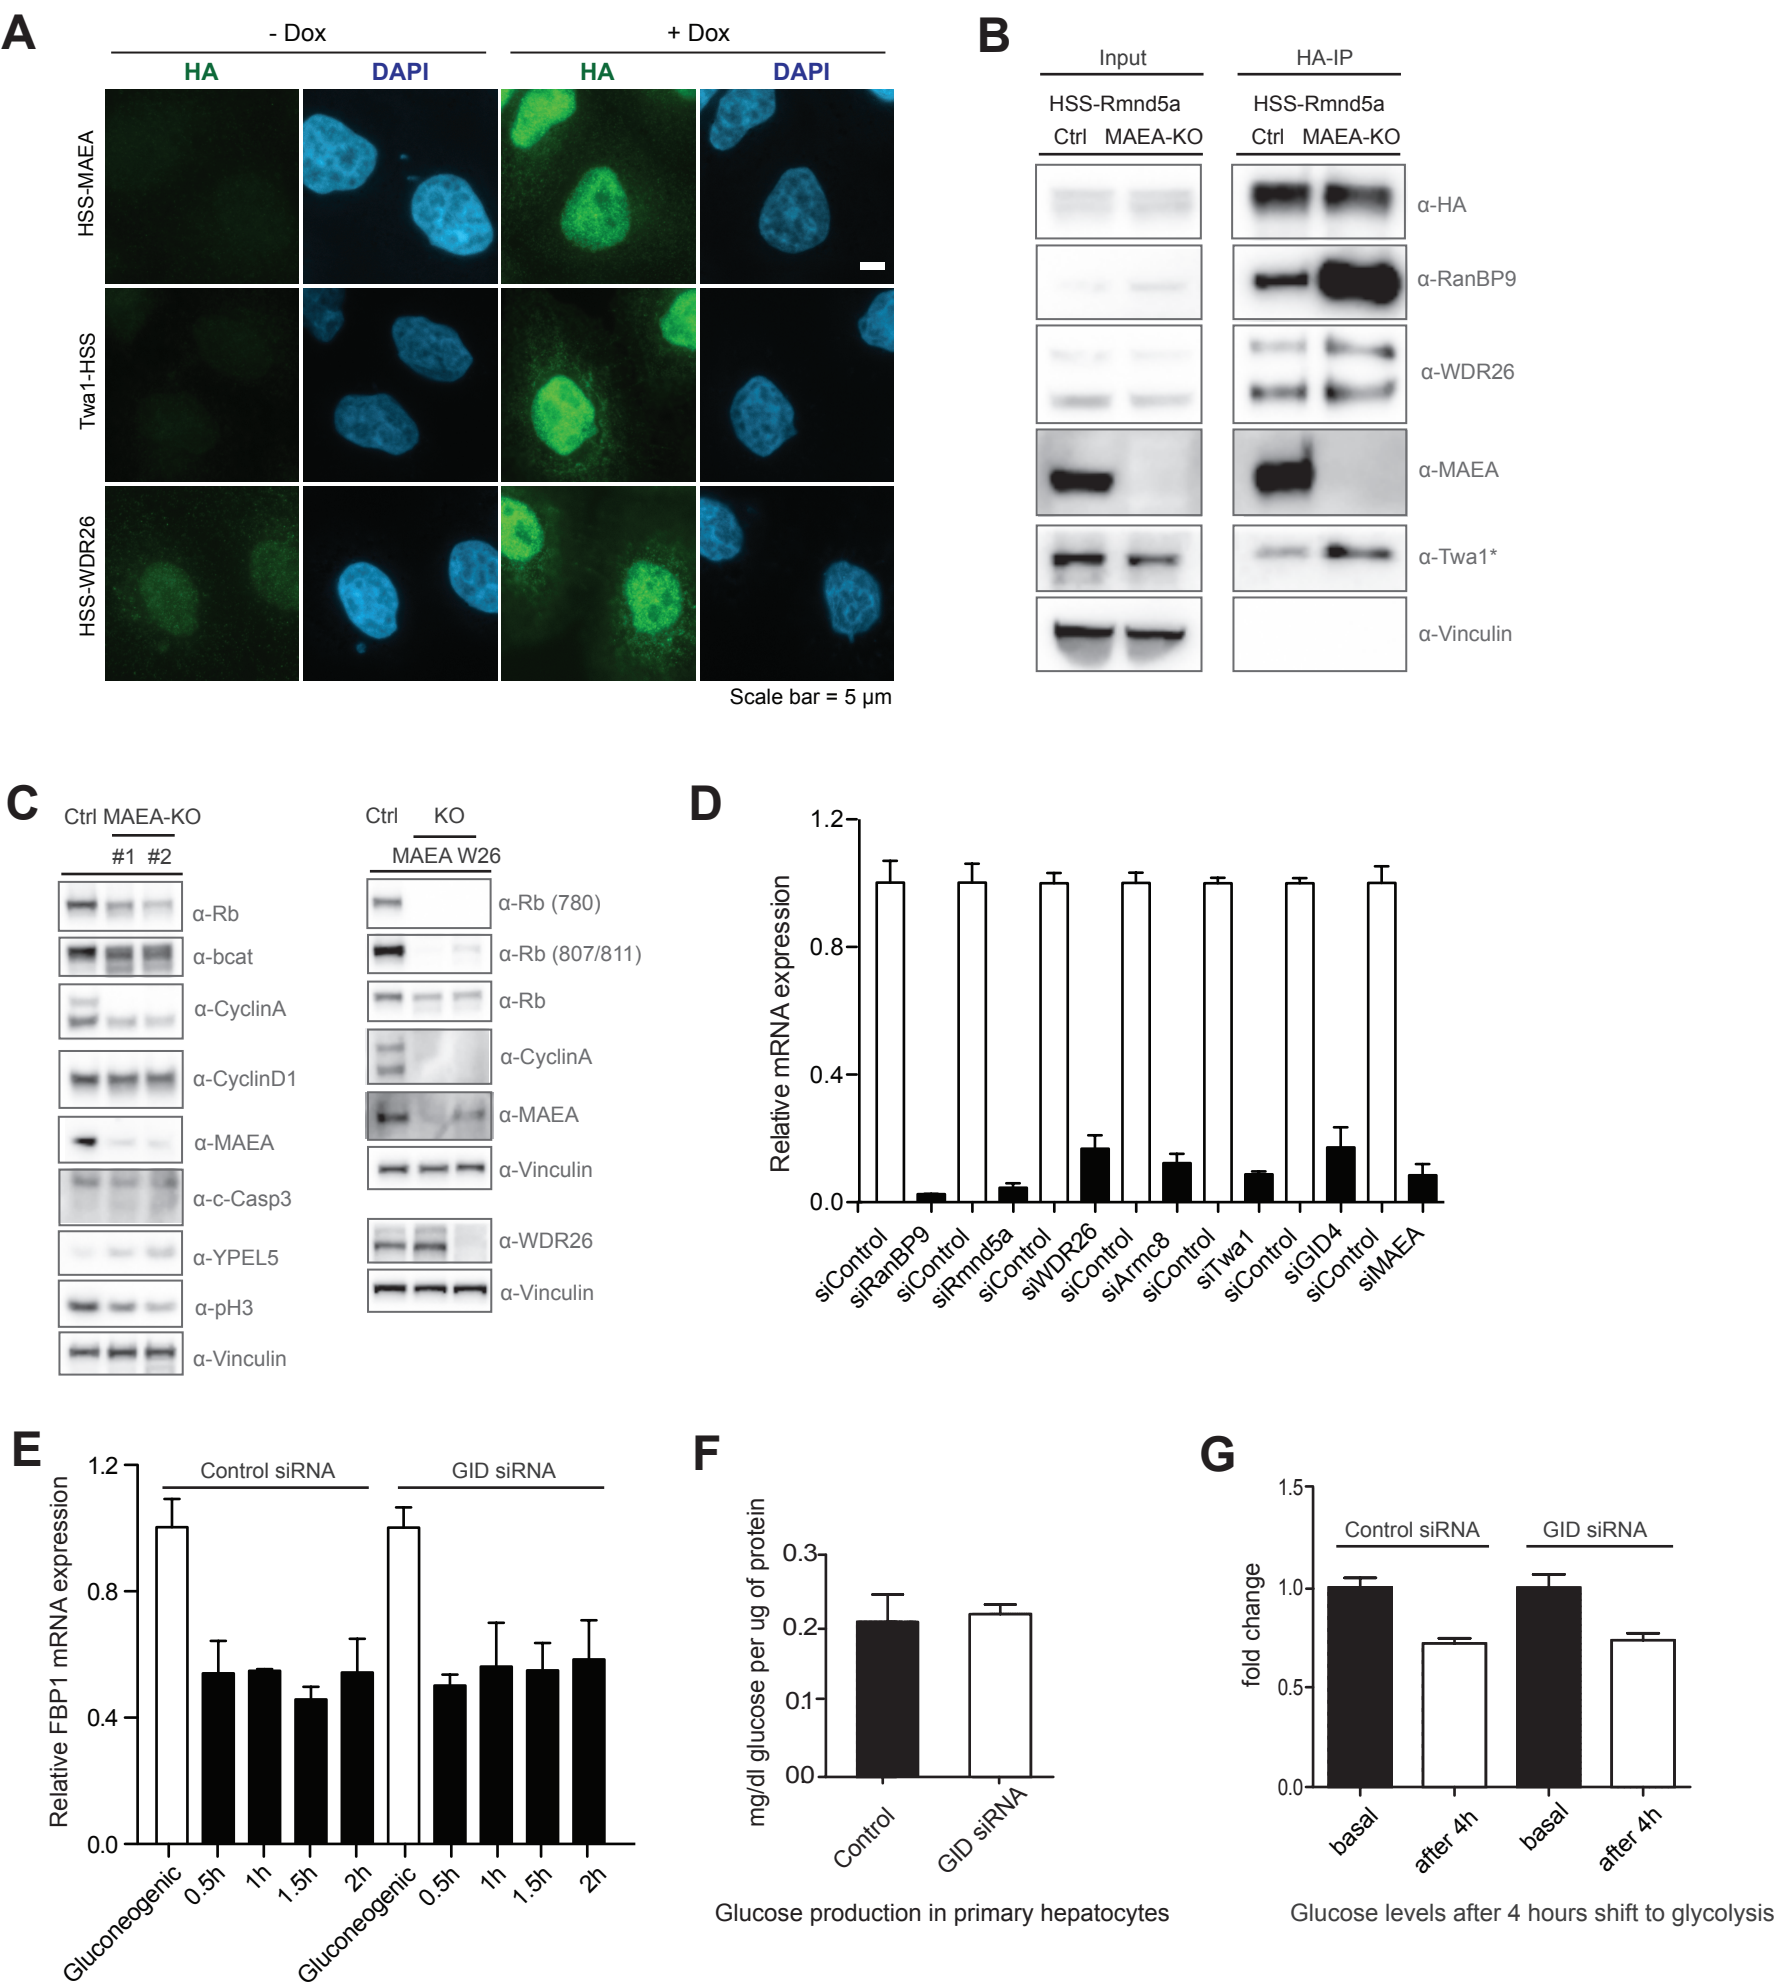

Supplement: supp [file elife_poa_e35528_Figure_3_figure_supplement_1.pdf › elife_poa_e35528_Figure_3_figure_supplement_1.pdf]

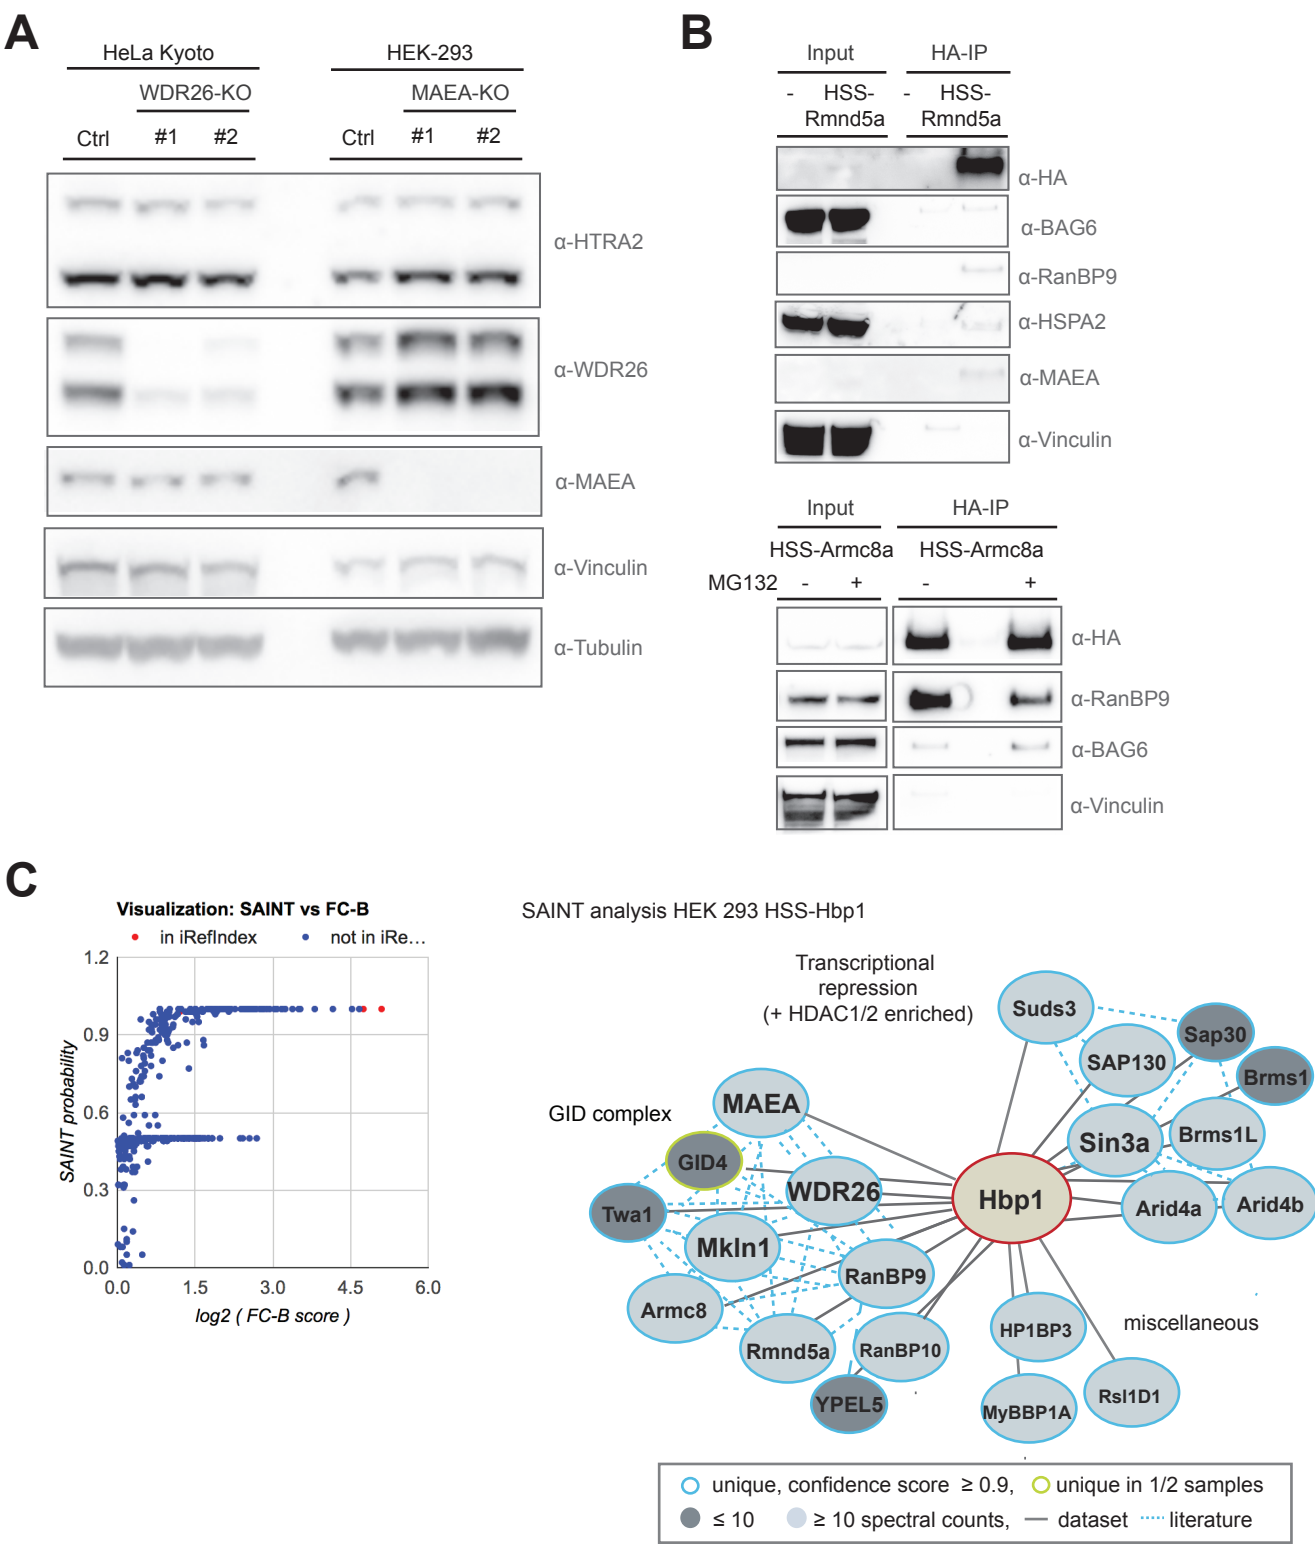

Supplement: supp [file elife_poa_e35528_Figure_4_figure_supplement_1.pdf › elife_poa_e35528_Figure_4_figure_supplement_1.pdf]

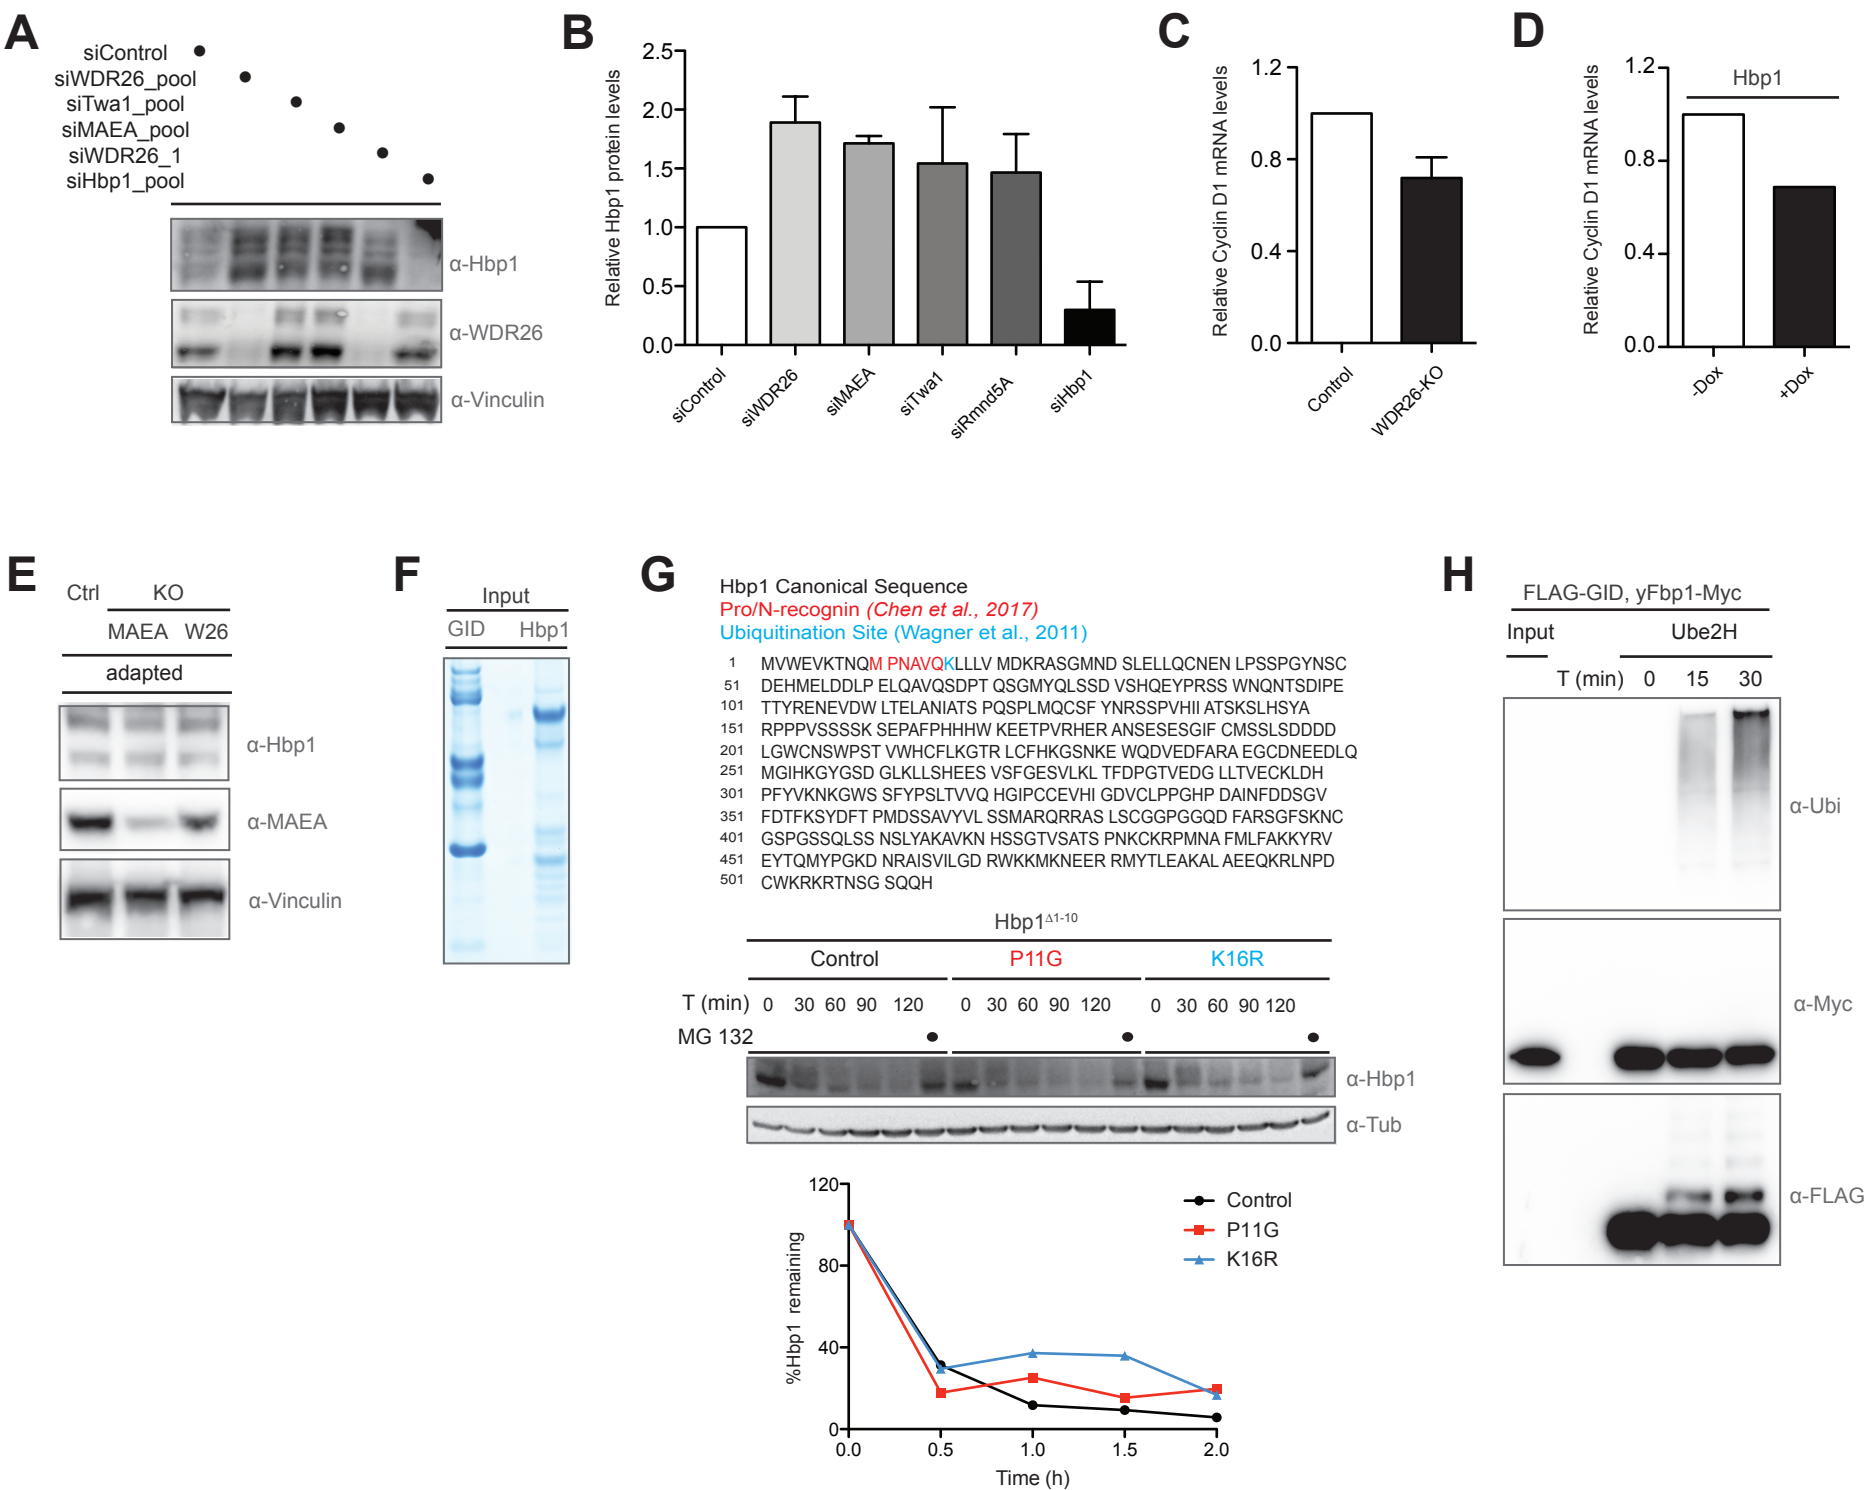

Supplement: supp [file elife_poa_e35528_Figure_5_figure_supplement_1.pdf › elife_poa_e35528_Figure_5_figure_supplement_1.pdf]
